# Supplementary material for: Copper-coordination induced fabrication of stimuli-responsive polymersomes from amphiphilic block copolymer containing pendant thioethers
Source: Royal Society of Chemistry journal article supplement (doi:10.1039/d1py00371b), 2021-01-01
Supplement: d1py00371b1.pdf [file d1py00371b1.pdf]

## Supporting Information

# **Copper-Coordination Induced Fabrication of Stimuli-Responsive Polymersomes from Amphiphilic Block Copolymer Containing Pendant Thioethers**

*Shuqi Dong, Li Liu, Hanying Zhao*

Key Laboratory of Functional Polymer Materials, Ministry of Education, Institute of Polymer Chemistry, College of Chemistry, Nankai University, Tianjin 300071, People's Republic of China.

**Synthesis of phenylboronate containing N-hydroxysuccinimide ester (C1).** The phenylboronate containing N-hydroxysuccinimide ester (C1) was prepared according to the reported method with minor modification.<sup>1</sup> Di(N-succinimidyl) carbonate (DSC) (6.53 g, 25.5 mmol) was dissolved in dry acetonitrile (70 mL) and the solution of 4-(hydroxymethyl) benzeneboronic acid pinacol ester (3.98 g, 17 mmol) in 30 mL of dry acetonitrile and triethylamine (TEA) (4.7 mL, 34 mmol) were added dropwise. After the mixture was stirred for 7 h under Ar atmosphere at room temperature, the reaction solution was diluted with 200 mL chloroform (CHCl<sub>3</sub>) and washed with deionized water (150 mL × 3). The organic layer was collected, dried over anhydrous Na<sub>2</sub>SO<sub>4</sub> and filtered. The filtrate was concentrated to dryness and the residue was purified by column chromatography (dichloromethane: ethyl acetate = 20:1.5, v/v) to obtain C1 (3.65 g, 44%) as a white solid. <sup>1</sup>H NMR (Fig. S1, 400 MHz, CDCl<sub>3</sub>): δ = 1.33 (a, 12H, s), δ = 7.81 (b, 2H, d), δ = 7.36 (c, 2H, d), δ = 5.31 (d, 2H, s), δ = 2.81 ppm (e, 4H, s).

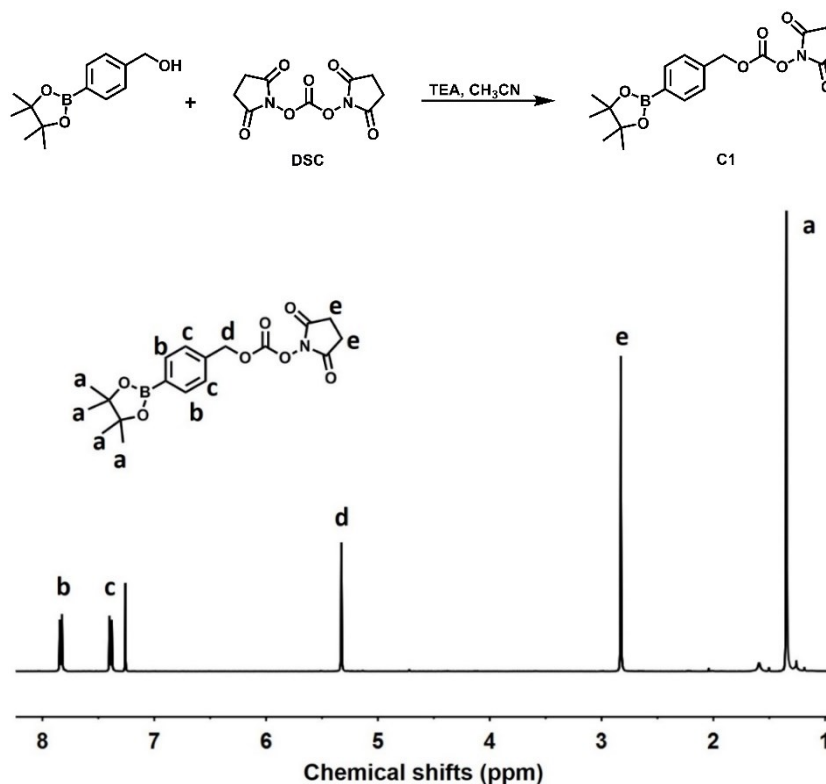

**Fig. S1** <sup>1</sup>H NMR spectrum of C1.

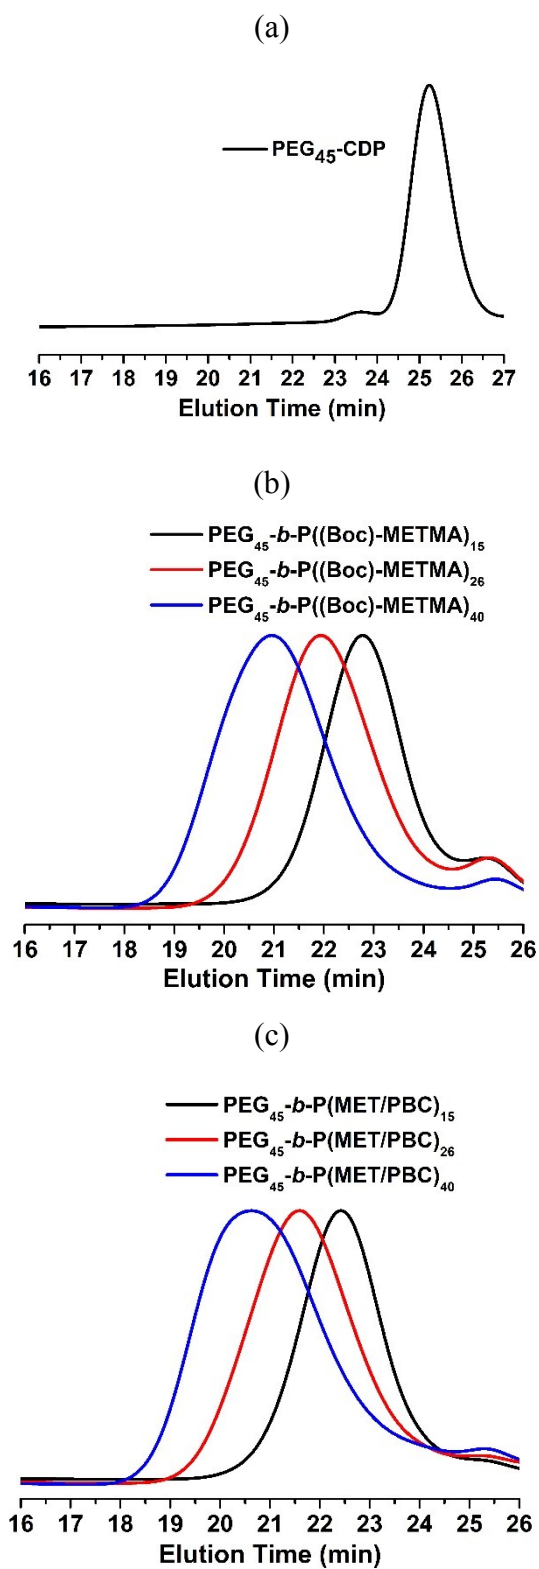

**Fig. S2** GPC traces of PEG<sub>45</sub>-CDP (a), PEG<sub>45</sub>-*b*-P((Boc)-METMA)<sub>n</sub> diblock copolymers (b), and PEG<sub>45</sub>-*b*-P(MET/PBC)<sub>n</sub> diblock copolymers (c).

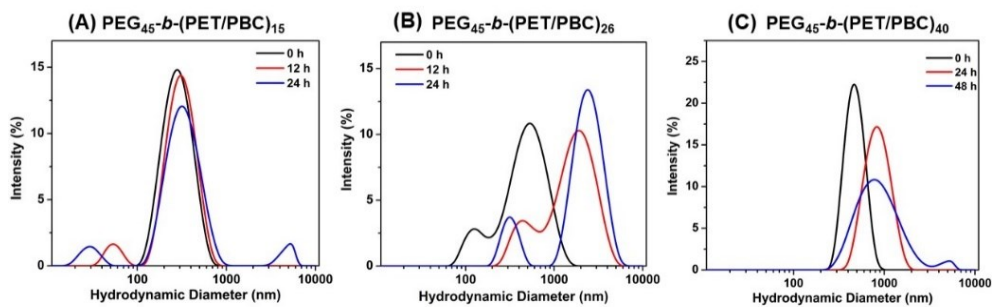

**Fig. S3** DLS curves of  $\text{PEG}_{45}\text{-}b\text{-P(MET/PBC)}_n$  self-assemblies in the aqueous solution after incubation with  $\text{H}_2\text{O}_2$  (10 mM) at  $37^\circ\text{C}$ .

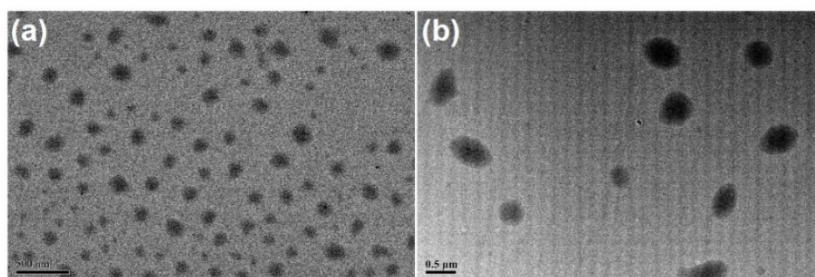

**Fig. S4** TEM images of  $\text{PEG}_{45}\text{-}b\text{-P(MET/PBC)}_{15}$  micelles (a) and  $\text{PEG}_{45}\text{-}b\text{-P(MET/PBC)}_{15}/\text{Cu}^{2+}$  co-assemblies (b).

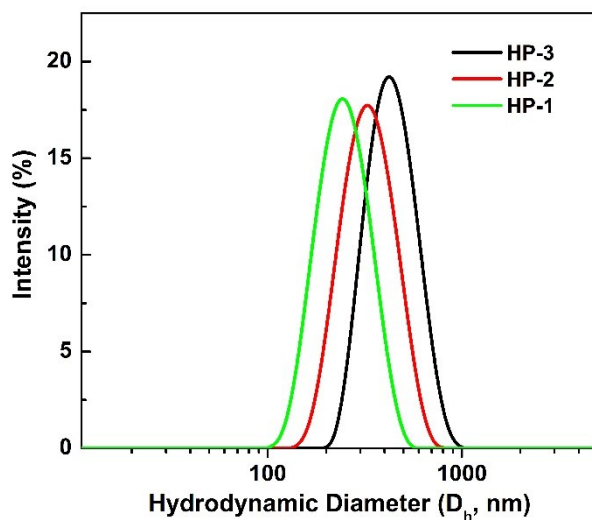

**Fig. S5.** DLS curves of  $\text{PEG}_{45}\text{-}b\text{-P(MET/PBC)}_{26}/\text{Cu}^{2+}$  co-assemblies prepared at various feeding ratios of  $\text{Cu}^{2+}$ /thioether (HP-1: 0.5/1 (mol/mol); HP-2: 1/1 (mol/mol); HP-3: 2/1 (mol/mol)).

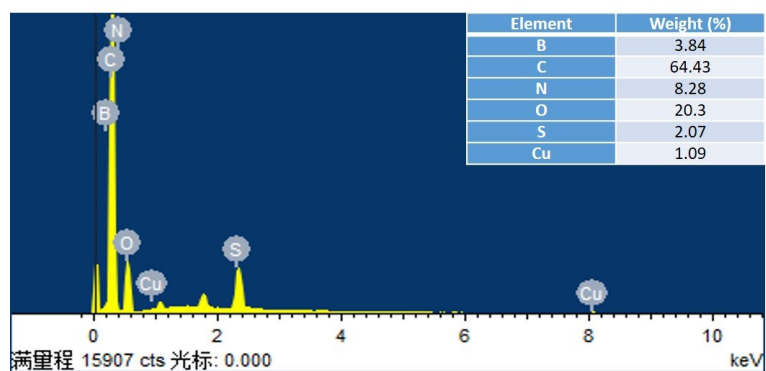

**Fig. S6** EDS data of HP-3 polymersomes.

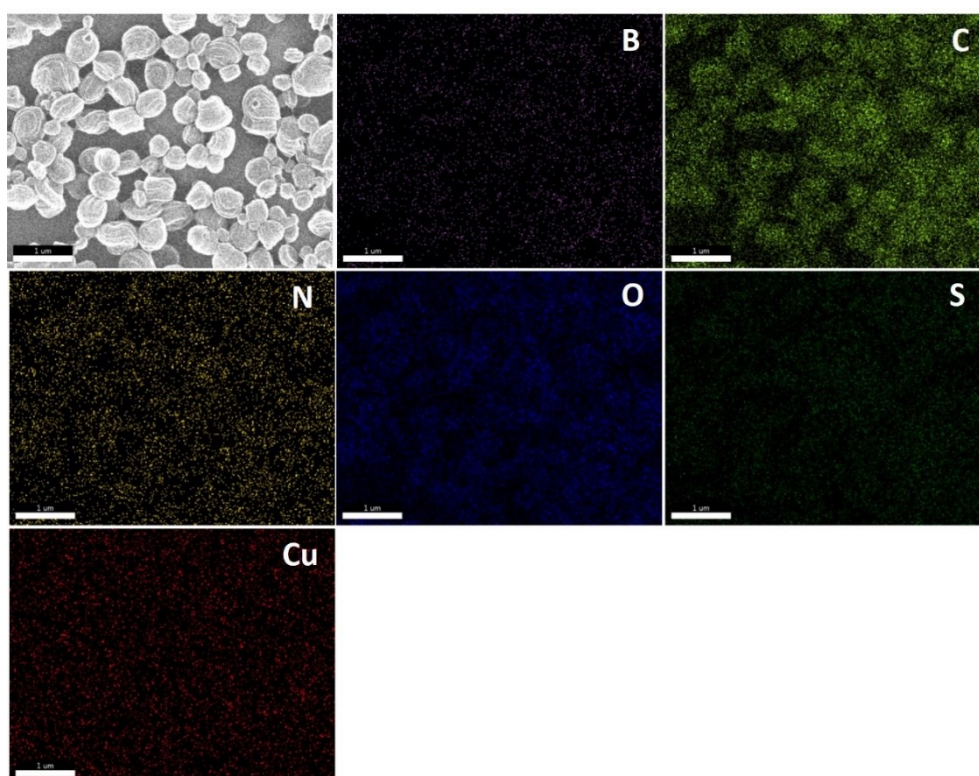

**Fig. S7** SEM image and elemental mapping analysis (B, C, N, O, S, Cu) of HP-3 polymersomes.

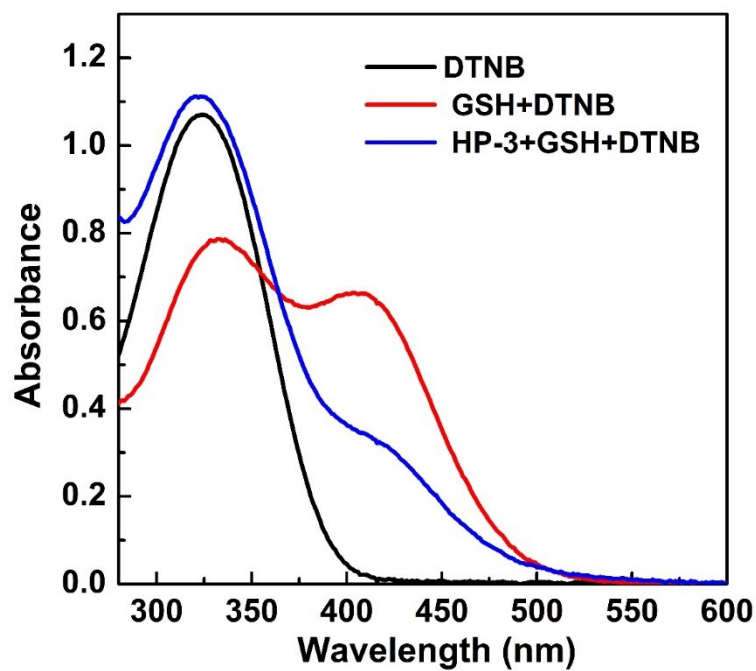

**Fig. S8** UV-vis spectra of Ellman's assay for GSH with/without the HP-3 polymersomes.

#### References:

1. Ikeda, M.; Tanida, T.; Yoshii, T.; Hamachi, I., Rational molecular design of stimulus-responsive supramolecular hydrogels based on dipeptides. *Adv Mater* **2011**, 23 (25), 2819-22.
